# Supplementary material for: miR-371a-3p, miR-373-3p and miR-367-3p as Serum Biomarkers in Metastatic Testicular Germ Cell Cancers Before, During and After Chemotherapy
Source: PubMed Central journal article supplement (PMC6830325; doi:10.3390/cells8101221), 2019-10-08
Supplement: cells-08-01221-s001.pdf [file cells-08-01221-s001.pdf]

## Supplementary tables on miR levels, classical tumor markers and correlations

Supplementary table 1. Correlation of LDH, AFP and  $\beta$ -HCG levels with miR-371a-3p, miR-373-3p and miR-367-3p relative levels before start of chemotherapy in cohort 1.

| Tumor marker                 | miR-371a-3p | miR-373-3p | miR-367-3p |
|------------------------------|-------------|------------|------------|
| LDH ( <i>n</i> =60)          |             |            |            |
| - Correlation coefficient    | 0.694       | 0.587      | 0.359      |
| - <i>p</i> *                 | <0.001      | <0.001     | 0.005      |
| $\beta$ -HCG ( <i>n</i> =61) |             |            |            |
| - Correlation coefficient    | 0.258       | 0.076      | 0.079      |
| - <i>p</i> *                 | 0.045       | 0.558      | 0.543      |
| AFP ( <i>n</i> =62)          |             |            |            |
| - Correlation coefficient    | -0.005      | -0.063     | 0.111      |
| - <i>p</i> *                 | 0.968       | 0.628      | 0.391      |

LDH: lactate dehydrogenase; AFP: alpha-fetoprotein;  $\beta$ -HCG: human chorionic gonadotropin.  
\*Spearman correlation coefficient significance, 95% confidence interval

Supplementary table 2. miR-371a-3p, miR-373-3p and miR-367-3p relative levels before start of chemotherapy in cohort 1 with good versus intermediate/poor prognosis.

|             | Good prognosis<br><i>n</i> =56 | Intermediate/Poor<br>prognosis<br><i>n</i> =11 | <i>p</i> * |
|-------------|--------------------------------|------------------------------------------------|------------|
| miR-371a-3p |                                |                                                |            |
| - Median    | 15.3                           | 73.2                                           |            |
| - Range     | 0-1312.7                       | 0.09-2538.3                                    | 0.041      |
| miR-373-3p  |                                |                                                |            |
| - Median    | 16.7                           | 28.5                                           |            |
| - Range     | 0.06-580.8                     | 0.6-1778.3                                     | 0.417      |
| miR-367-3p  |                                |                                                |            |
| - Median    | 0.3                            | 0.4                                            |            |
| - Range     | 0-73.5                         | 0-128.4                                        | 0.091      |

Prognostic-based groups according to the IGCCCG classification  
\*Mann Whitney U test significance

Supplementary table 3. Correlation of LDH,  $\beta$ -HCG and AFP levels with miR-371a-3p, miR-373-3p and miR-367-3p relative levels before start of chemotherapy in both cohorts 1 and 2 combined.

| <b>Tumor marker</b>                                                                                                                                                        | <b>miR-371a-3p</b> | <b>miR-373-3p</b> | <b>miR-367-3p</b> |
|----------------------------------------------------------------------------------------------------------------------------------------------------------------------------|--------------------|-------------------|-------------------|
| LDH ( <i>n</i> =101)                                                                                                                                                       |                    |                   |                   |
| - Correlation coefficient                                                                                                                                                  | 0.658              | 0.605             | 0.501             |
| - <i>p</i> *                                                                                                                                                               | <0.001             | <0.001            | <0.001            |
| $\beta$ -HCG ( <i>n</i> =102)                                                                                                                                              |                    |                   |                   |
| - Correlation coefficient                                                                                                                                                  | 0.295              | 0.263             | 0.143             |
| - <i>p</i> *                                                                                                                                                               | 0.003              | 0.007             | 0.151             |
| AFP ( <i>n</i> =104)                                                                                                                                                       |                    |                   |                   |
| - Correlation coefficient                                                                                                                                                  | 0.051              | 0.016             | 0.194             |
| - <i>p</i> *                                                                                                                                                               | 0.605              | 0.868             | 0.049             |
| LDH: lactate dehydrogenase; AFP: alpha-fetoprotein; $\beta$ -HCG: human chorionic gonadotropin.<br>*Spearman correlation coefficient significance, 95% confidence interval |                    |                   |                   |

Supplementary table 4. miR-371a-3p, miR-373-3p and miR-367-3p relative levels before start of chemotherapy in cohort 1 and 2 combined in non-seminoma and seminoma (*n*=108 baseline measurements).

|                                   | <b>Non-seminoma<br/><i>n</i>=85</b> | <b>Seminoma<br/><i>n</i>=23</b> | <b><i>p</i>*</b> |
|-----------------------------------|-------------------------------------|---------------------------------|------------------|
| miR-371a-3p                       |                                     |                                 |                  |
| - Median                          | 20.4                                | 94.8                            |                  |
| - Range                           | 0-4535.7                            | 0.1-3481.9                      | 0.037            |
| miR-373-3p                        |                                     |                                 |                  |
| - Median                          | 19.9                                | 124.7                           |                  |
| - Range                           | 0.06-3174.1                         | 0.8-1031.9                      | 0.005            |
| miR-367-3p                        |                                     |                                 |                  |
| - Median                          | 1.0                                 | 4.8                             |                  |
| - Range                           | 0-416.0                             | 0-93.0                          | 0.474            |
| *Mann Whitney U test significance |                                     |                                 |                  |

Supplementary table 5. miR-371a-3p, miR-373-3p and miR-367-3p relative levels before start of chemotherapy in cohort 1 and 2 combined in good, intermediate and poor risk IGCCCG groups ( $n=109$  baseline measurements).

|                                                                                                     | <b>Good prognosis<br/><math>n=67</math></b> | <b>Intermediate prognosis<br/><math>n=25</math></b> | <b>Poor prognosis<br/><math>n=17</math></b> | <b>Intermediate vs good</b> | <b>Poor vs good</b> |
|-----------------------------------------------------------------------------------------------------|---------------------------------------------|-----------------------------------------------------|---------------------------------------------|-----------------------------|---------------------|
| miR-371a-3p<br>- Median<br>- Range<br>- $p^*$                                                       | 17.8<br>0-1312.7                            | 97.6<br>0-3481.9                                    | 40.5<br>0-4535.7                            | 0.016                       | 0.178               |
| miR-373-3p<br>- Median<br>- Range<br>- $p^*$                                                        | 20.5<br>0.06-580.8                          | 127.0<br>0.6-3174.1                                 | 48.3<br>0.5-2779.5                          | 0.010                       | 0.134               |
| miR-367-3p<br>- Median<br>- Range<br>- $p^*$                                                        | 0.5<br>0-73.5                               | 10.9<br>0.02-416                                    | 4.0<br>0-265.5                              | 0.002                       | 0.060               |
| Prognostic-based groups according to the IGCCCG classification<br>*Mann Whitney U test significance |                                             |                                                     |                                             |                             |                     |

Supplementary table 6. miR-371a-3p, miR-373-3p and miR-367-3p relative levels before start of chemotherapy in non-seminoma patients from cohort 1 and 2 combined in good, intermediate and poor risk IGCCCG groups ( $n=85$  baseline measurements).

|                                                                                                     | <b>Good prognosis<br/><math>n=50</math></b> | <b>Intermediate prognosis<br/><math>n=19</math></b> | <b>Poor prognosis<br/><math>n=16</math></b> | <b>Intermediate vs good</b> | <b>Poor vs good</b> |
|-----------------------------------------------------------------------------------------------------|---------------------------------------------|-----------------------------------------------------|---------------------------------------------|-----------------------------|---------------------|
| miR-371a-3p<br>- Median<br>- Range<br>- $p^*$                                                       | 13.7<br>0-1063.6                            | 106.6<br>0-2538.3                                   | 38.2<br>0-4535.7                            | 0.005                       | 0.089               |
| miR-373-3p<br>- Median<br>- Range<br>- $p^*$                                                        | 12<br>0.06-224                              | 127<br>0.6-3174.1                                   | 38.4<br>0.5-2779.5                          | 0.003                       | 0.030               |
| miR-367-3p<br>- Median<br>- Range<br>- $p^*$                                                        | 0.3<br>0-73.5                               | 34.8<br>0.02-416                                    | 4.2<br>0-265.5                              | 0.003                       | 0.012               |
| Prognostic-based groups according to the IGCCCG classification<br>*Mann Whitney U test significance |                                             |                                                     |                                             |                             |                     |

Supplementary table 7. miR-371a-3p, miR-373-3p and miR-367-3p relative levels before start of chemotherapy in cohort 1 and 2 combined in stage II, III and IV ( $n=109$  baseline measurements).

|             | <b>Stage II<br/><i>n</i>=66</b> | <b>Stage III<br/><i>n</i>=12</b> | <b>Stage IV<br/><i>n</i>=31</b> | <b>Stage III<br/>vs<br/>stage II</b> | <b>Stage IV<br/>vs<br/>stage II</b> |
|-------------|---------------------------------|----------------------------------|---------------------------------|--------------------------------------|-------------------------------------|
| miR-371a-3p |                                 |                                  |                                 |                                      |                                     |
| - Median    | 22.9                            | 76.9                             | 40.5                            |                                      |                                     |
| - Range     | 0-2538.3                        | 0.1-1337.1                       | 0-4535.7                        |                                      |                                     |
| - $p^*$     |                                 |                                  |                                 | 0.091                                | 0.230                               |
| miR-373-3p  |                                 |                                  |                                 |                                      |                                     |
| - Median    | 25.6                            | 110.6                            | 29.5                            |                                      |                                     |
| - Range     | 0.06-3174.1                     | 0.8-482.8                        | 0.5-2779.5                      |                                      |                                     |
| - $p^*$     |                                 |                                  |                                 | 0.455                                | 0.255                               |
| miR-367-3p  |                                 |                                  |                                 |                                      |                                     |
| - Median    | 0.99                            | 8.4                              | 7.6                             |                                      |                                     |
| - Range     | 0-416.0                         | 0.06-416                         | 0-265.5                         |                                      |                                     |
| - $p^*$     |                                 |                                  |                                 | 0.007                                | 0.004                               |

\*Mann Whitney U test significance

Supplementary table 8. miR-371a-3p, miR-373-3p and miR-367-3p relative levels before start of chemotherapy comparing patients of cohort 1 and 2 combined with complete response, relapse and refractory disease ( $n=109$  baseline measurements).

|                                   | <b>Complete response<br/><math>n=60</math></b> | <b>Relapse<br/><math>n=34</math></b> | <b>Refractory disease<br/><math>n=15</math></b> | <b>Relapse vs complete response</b> | <b>Refractory disease vs complete response</b> | <b>Relapse vs refractory disease</b> |
|-----------------------------------|------------------------------------------------|--------------------------------------|-------------------------------------------------|-------------------------------------|------------------------------------------------|--------------------------------------|
| miR-371a-3p                       |                                                |                                      |                                                 |                                     |                                                |                                      |
| - Median                          | 19.1                                           | 89                                   | 10.7                                            |                                     |                                                |                                      |
| - Range                           | 0-2538.27                                      | 0-4535.7                             | 0-901.1                                         |                                     |                                                |                                      |
| - $p^*$                           |                                                |                                      |                                                 | 0.019                               | 0.419                                          | 0.039                                |
| miR-373-3p                        |                                                |                                      |                                                 |                                     |                                                |                                      |
| - Median                          | 23.7                                           | 109.5                                | 43.2                                            |                                     |                                                |                                      |
| - Range                           | 0.06-1778.3                                    | 0-3173.8                             | 0.5-442.6                                       |                                     |                                                |                                      |
| - $p^*$                           |                                                |                                      |                                                 | 0.036                               | 0.427                                          | 0.429                                |
| miR-367-3p                        |                                                |                                      |                                                 |                                     |                                                |                                      |
| - Median                          | 0.3                                            | 18.1                                 | 3.9                                             |                                     |                                                |                                      |
| - Range                           | 0-73.5                                         | 0-416                                | 0-305.3                                         |                                     |                                                |                                      |
| - $p^*$                           |                                                |                                      |                                                 | <0.001                              | 0.022                                          | 0.298                                |
| *Mann Whitney U test significance |                                                |                                      |                                                 |                                     |                                                |                                      |

Supplementary table 9: Details of the nine patients with a relapse after a biochemical complete remission without an elevated miR-371a-3p level at time of the relapse.

| Patient | Histology primary tumor | Site of relapse | Elevated tumor marker at time of relapse | Only teratoma present at relapsed site |
|---------|-------------------------|-----------------|------------------------------------------|----------------------------------------|
| 1       | NS [EC,YS]              | Retroperitoneum | AFP                                      | No                                     |
| 2       | NS [EC, T]              | Retroperitoneum | none                                     | Yes                                    |
| 3       | NS [EC,C]               | Mediastinum     | HCG                                      | No                                     |
| 4       | NS [EC,YS,T]            | Liver           | AFP                                      | No                                     |
| 5       | S                       | Retroperitoneum | LDH                                      | NA                                     |
| 6       | NS [EC,T]               | Lungs           | HCG                                      | No                                     |
| 7       | S                       | Mediastinum     | LDH                                      | NA                                     |
| 8       | NS [EC,T]               | Retroperitoneum | none                                     | Yes                                    |
| 9       | NS [YS,S,T]             | Retroperitoneum | AFP                                      | No                                     |

Embryonal carcinoma [E], Choriocarcinoma [C], Yolk sac [YS], Teratoma [T], Seminoma [S]. Not applicable [NA]

# Supplementary Figure 1

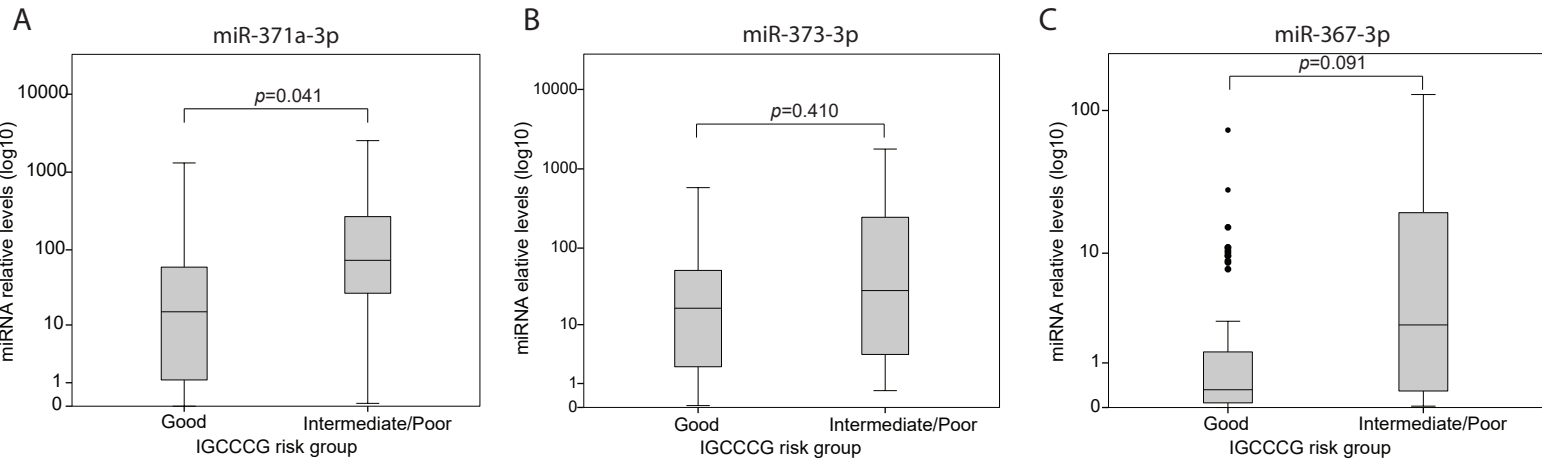

Relative levels of miR-371a-3p (A), miR-373-3p (B) and miR-367-3p (C) before start of chemotherapy in cohort 1 comparing good (n=56) and intermediate/poor risk (n=11) IGCCCG groups. p denotes Mann Whitney U test significance.

Supplementary Figure 2

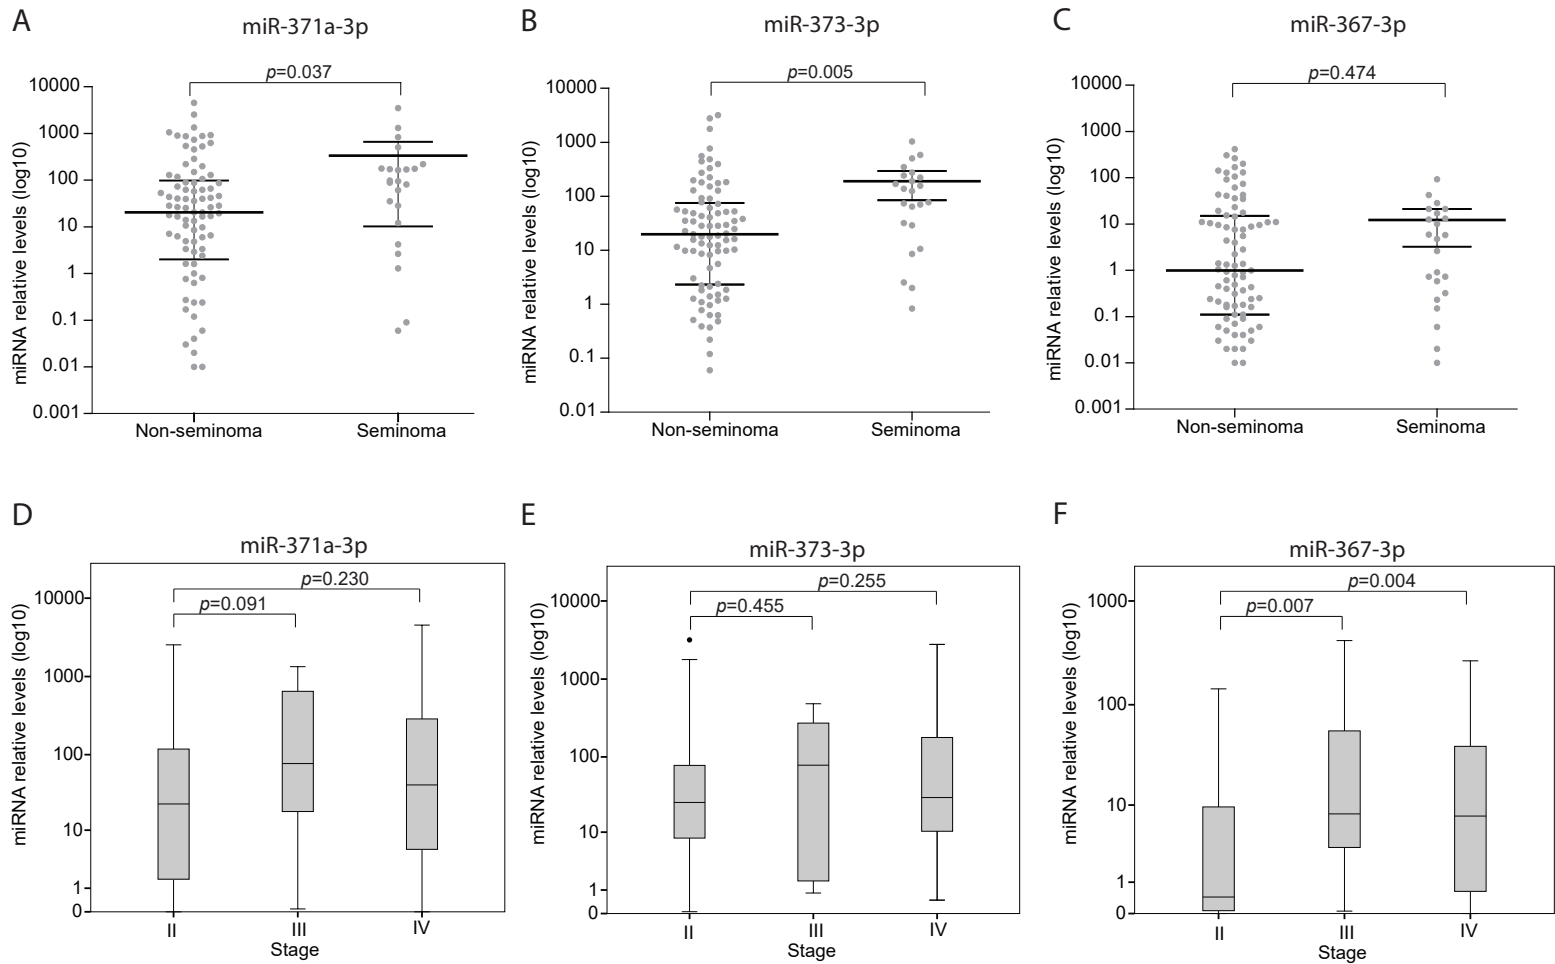

Relative level of miR-371a-3p (A), miR-373-3p (B) and miR-367-3p (C) before start of chemotherapy in cohort 1 and 2 combined comparing non-seminoma (n=85) and seminoma (n=23) tumors. Relative level of miR-371a-3p (D), miR-373-3p (E) and miR-367-3p (F) before start of chemotherapy in cohort 1 and 2 combined comparing stage II (n=66), stage III (n=12) and stage IV (n=31) tumors. p denotes Mann Whitney U test significance.



### Supplementary Figure 3

**A**

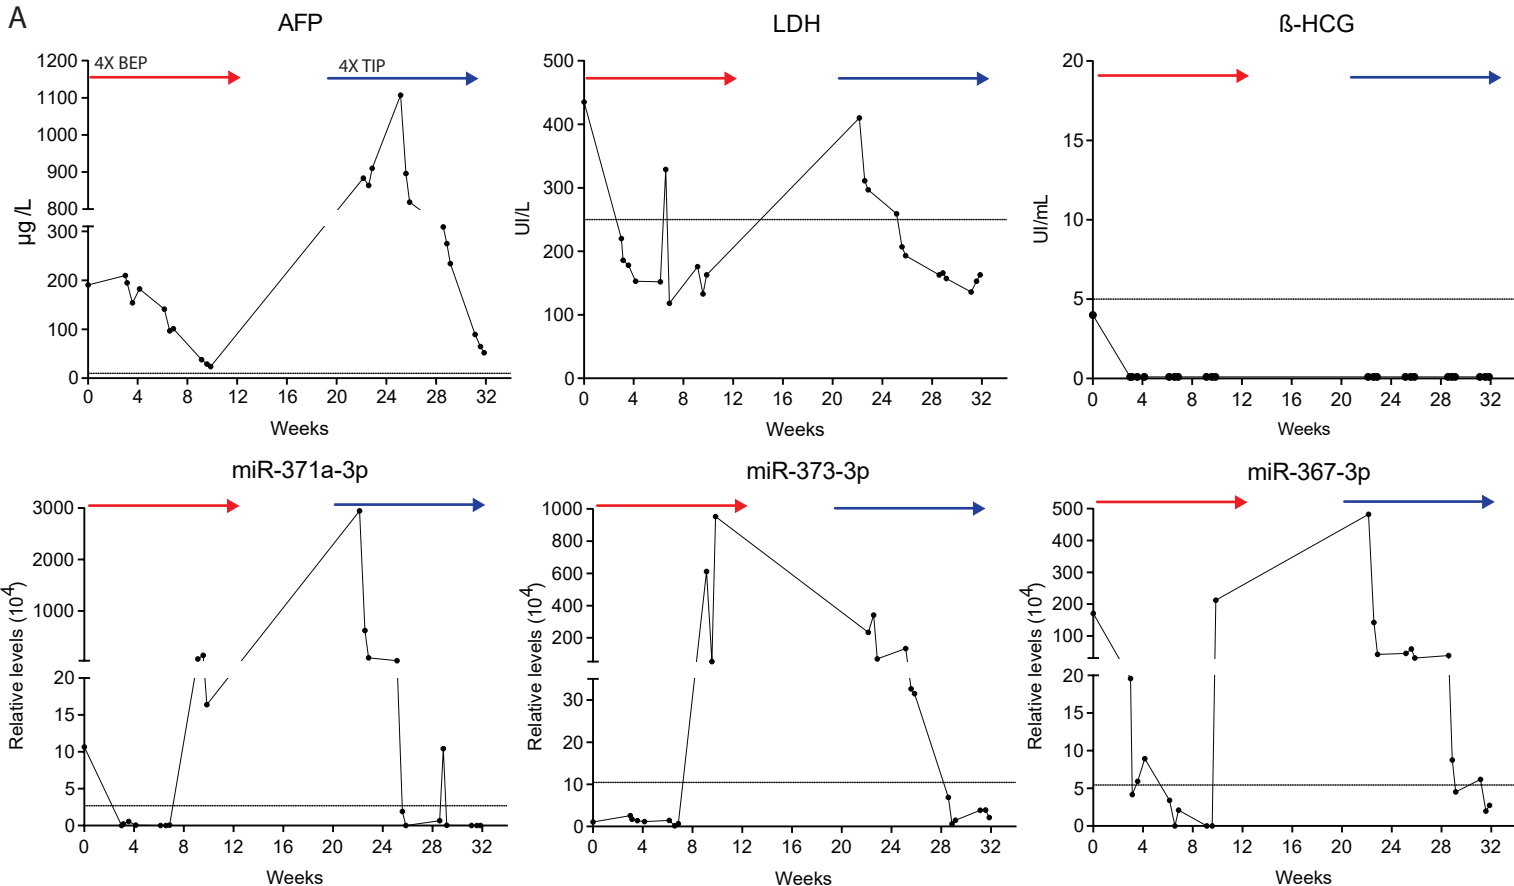

**B**

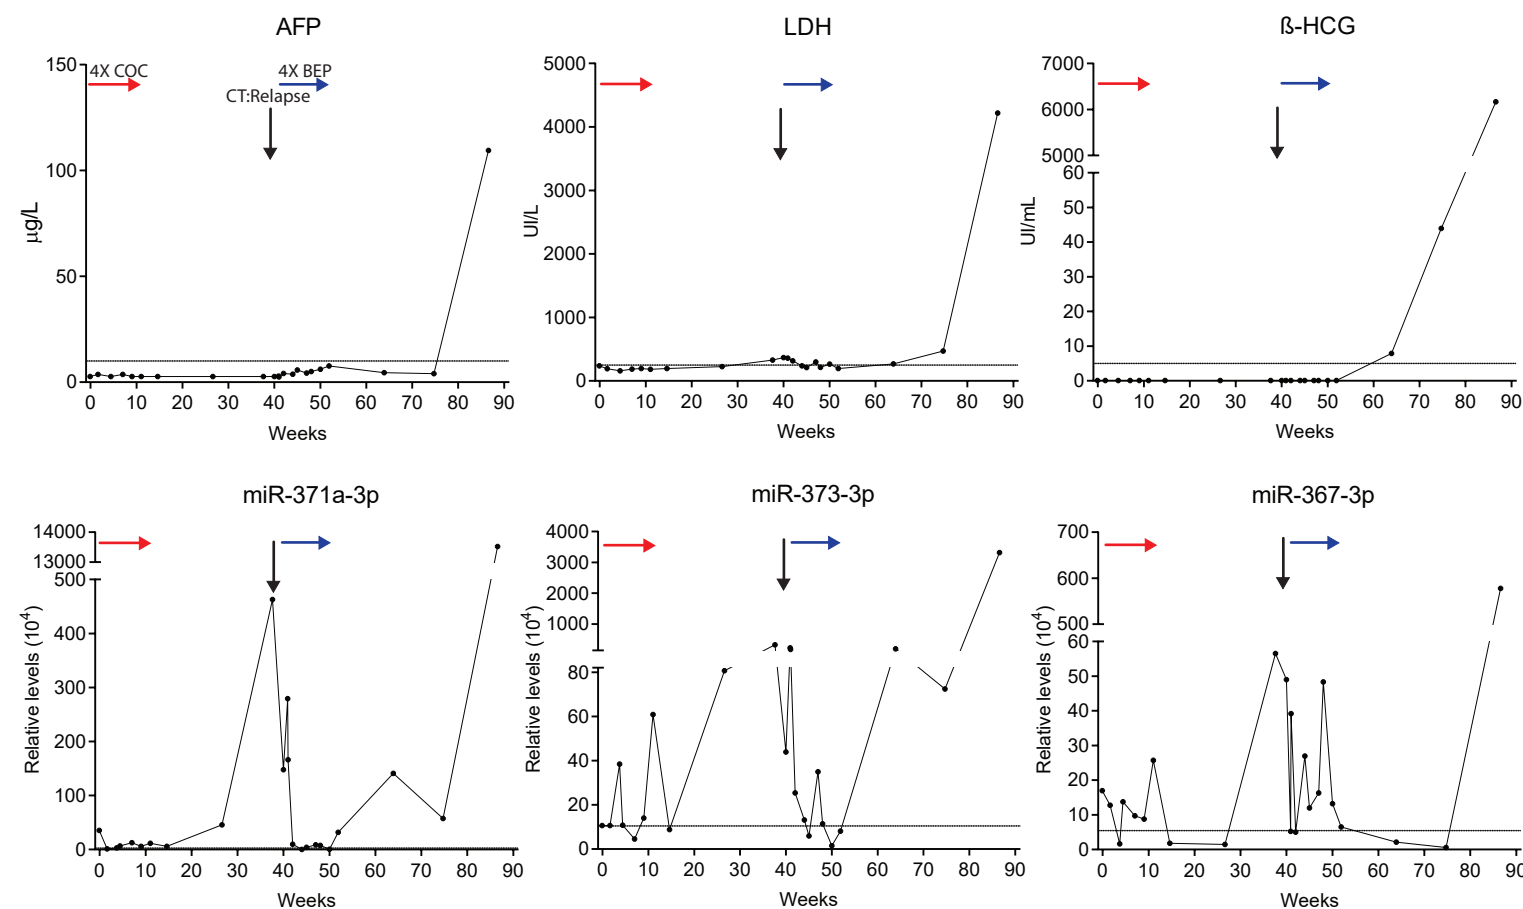

### Supplementary Figure 3

Levels of serum markers AFP ( $\mu\text{g/L}$ ), LDH (UI/L)  $\beta\text{-HCG}$  (UI/mL) and relative levels of miR-371a-3p, miR-373-3p and miR-367-3p at start of chemotherapy, during treatment (red and blue arrows) and follow-up of TGCC case 3 (A) and case 4 (B). Red and blue arrows indicate chemotherapy duration 4xBEP, 4XTIP (paclitaxel, ifosfamide and cisplatin), 4XCOC (cyclophosphamide, vincristine and carboplatin containing chemotherapy).
